# Supplementary material for: Gene polymorphisms of Patatin-like phospholipase domain containing 3 (PNPLA3), adiponectin, leptin in diabetic obese patients
Source: PubMed Central journal article supplement (PMC7297308; doi:10.1371/journal.pone.0234465), 2020-06-16
Supplement: pone.0234465.s002.pdf [file pone.0234465.s002.pdf]

Dear

English language needs revision and paragraphs need rephrasing as well  
More details are required in the methods

Limitations and future prospective are to be there

Good luck
